# Supplementary material
Source: Royal Society of Chemistry journal article supplement (doi:10.1039/d6tb00717a)
Supplement: d6tb00717a1.pdf [file d6tb00717a1.pdf]

1  
2  
3  
4  
5  
6  
7  
8  
9  
10  
11  
12  
13  
14

## Supporting Information

Exosome-modified mesoporous polydopamine with saikosaponin D and  
ferric ion for immunotherapy of metastatic breast cancer

Mengzhu Zhang, Yuzhu Hou, Botong Liu, Fei Yan, Rui Su\*

*State Key Laboratory of Inorganic Synthesis and Preparative Chemistry, College of  
Chemistry, Jilin University, Changchun 130012, China*

\* Corresponding authors.

Tel. and Fax: +86-431-85168986.

E-mail: [rsu@jlu.edu.cn](mailto:rsu@jlu.edu.cn) (R. Su).

## 15 **Materials and methods**

### 16 **Materials**

17 Pluronic F127, 1,3,5-trimethylbenzene (TMB,  $\geq 98\%$ ), dopamine ( $\geq 99\%$ ), ferric  
18 chloride hexahydrate ( $\text{FeCl}_3 \cdot 6\text{H}_2\text{O}$ ,  $\geq 98\%$ ), Saikosaponin D (SSd,  $\geq 98\%$ ), Cell Counting  
19 Kit-8 (CCK-8) and Nile red ( $\geq 98\%$ ) were all purchased from Sigma-Aldrich (Shanghai,  
20 China). ExoQuick Exosome Precipitation Solution was acquired from System  
21 Biosciences (CA, USA). Live/Dead cell assay kit (L3224) was purchased from Invitrogen  
22 (USA). Anti-PCNA antibody (ab29) was obtained from Abcam (Cambridge, UK). All  
23 Enzyme-linked immunosorbent assay (ELISA) kits were purchased from ThermoFisher  
24 (Waltham, MA, USA).

25

### 26 **Animals**

27 The animal experiment was approved by the Animal Ethics Committee of Changchun  
28 University of Chinese Medicine (license No. 2023112). Female BALB/c mice, aged 4 to  
29 6 weeks and weighing approximately 16 g, were obtained from Vital River Laboratory  
30 Animal Technology Co., Ltd. (Beijing, China) and were raised in a specific pathogen-  
31 free facility. The mice were allowed to acclimate to their environment for one week prior  
32 to the experiments and were housed under specific pathogen-free conditions with  
33 unrestricted access to food and water.

34

### 35 **Photothermal performance study**

36 To test the photothermal properties of MFSE, 100  $\mu\text{L}$  of aqueous MFSE solution at  
 37 concentrations of 0, 50, 100, 200 and 400  $\mu\text{g/mL}$  was irradiated using an 808 nm  
 38 continuous wavelength laser at a power of 1  $\text{W/cm}^2$ . Another 200  $\mu\text{g/mL}$  of MFSE  
 39 solution was an irradiated with 808 nm continuous wavelength laser at 0, 0.5, 1.0 and 1.5  
 40  $\text{W/cm}^2$ . The temperature changes before and after irradiation were finally recorded by  
 41 infrared thermography. Photothermal conversion efficiency

$$42 \quad \eta = \frac{hS(T_{max} - T_{surr}) - Q_0}{I(1 - 10^{-A_{808nm}})} \quad (1)$$

$$43 \quad hS = \frac{m_d C_d}{t_s} \quad (2)$$

$$44 \quad t_s = -\frac{t}{\ln \theta} \quad (3)$$

$$45 \quad \theta = \frac{T - T_{surr}}{T_{max} - T_{surr}} \quad (4)$$

46  $T_{max}$ ,  $T_{surr}$  and  $T$  are the maximum temperature of the sample in water, the ambient  
 47 temperature and the cooling cycle stage respectively.  $h$  is the heat transfer coefficient,  $S$   
 48 is the laser irradiation area,  $Q_0$  the energy absorbed by pure water under 808nm laser  
 49 irradiation.  $I$  is the laser power density of the 808 nm laser output.  $A_{808nm}$  is the UV-visible  
 50 absorption luminosity value at a wavelength of 808nm.  $m_d$  is the mass of the solution.  $C_d$   
 51 is the specific heat capacity of water. The final photothermal conversion efficiency ( $\eta$ ) is  
 52 derived from equation (1) (2) (3) and (4).

53

#### 54 Cell culture

55 Breast cancer cell line 4T1 was purchased from American Tissue Culture Collection.  
56 4T1 cells were cultured in 1640 culture medium containing 10% fetal bovine serum  
57 (FBS), 1% penicillin/streptomycin, at 37°C, with 5% CO<sub>2</sub>.

58

### 59 **Cytotoxicity assay**

60 The cytotoxicity assay was detected using CCK-8 reagent. Briefly, 4T1 and MCF-10A  
61 cells were inoculated into a 96-well plate at a density of 5000 cells per well and cultured  
62 for 12 h. The original medium was replaced with different concentrations of MFSE,  
63 incubated for 2 h, irradiated with an 808 nm laser at 1 W/cm<sup>2</sup> for 10 min and continued  
64 to incubate for 24 h. The original medium was replaced with fresh medium and 10 uL of  
65 CCK-8 was added to each well, further incubated at 37°C for 30 min. The absorbance of  
66 the samples was measured at 450 nm. All experiments were repeated in triplicate.

67

### 68 **Live/dead cell experiment**

69 The experiments were conducted with live/dead cell assay kit according to the  
70 manufacturer's instructions. 4T1 cells were inoculated into a 6-well plate at a density of  
71  $1.5 \times 10^5$  per well and cultured for 12 h. After that, the 4T1 cells were sequentially treated  
72 with PBS, PBS + NIR (1 W/cm<sup>2</sup>, 5 min, 808 nm), SSd (0.2 µg/mL), SSd (0.2 µg/mL) +  
73 NIR (1 W/cm<sup>2</sup>, 5 min, 808 nm), MFE (200 µg/mL), MFE (200 µg/mL) + NIR (1 W/cm<sup>2</sup>,  
74 5 min, 808 nm), MFSE (200 µg/mL), MFSE (200 µg/mL) + NIR (1 W/cm<sup>2</sup>, 5 min, 808  
75 nm), respectively. After incubation for the next 12 h, the cells in each well were stained

76 with Calcein-AM (1  $\mu$ L) for 30 min and PI (2  $\mu$ L) for 10 min in a blank medium and  
77 imaged by the fluorescence.

78

### 79 **Wound-healing assays**

80 4T1 cells were inoculated into a 6-well plate at a density of  $1.5 \times 10^5$  per well and  
81 cultured for 12 h. The cells were scratched vertically at the bottom of the medium using  
82 a 1 mL gun tip, and then the 4T1 cells were sequentially treated with PBS, PBS + NIR (1  
83 W/cm<sup>2</sup>, 5 min, 808 nm), SSd (0.2  $\mu$ g/mL), SSd (0.2  $\mu$ g/mL) + NIR (1 W/cm<sup>2</sup>, 5 min, 808  
84 nm), MFE (200  $\mu$ g/mL), MFE (200  $\mu$ g/mL) + NIR (1 W/cm<sup>2</sup>, 5 min, 808 nm), MFSE  
85 (200  $\mu$ g/mL), MFSE (200  $\mu$ g/mL) + NIR (1 W/cm<sup>2</sup>, 5 min, 808 nm), and continued to  
86 incubate for 24 h. The cells were observed by fluorescence microscopy. Migration  
87 distances were processed with Image J. All experiments were repeated three times.

88

### 89 **Cellular uptake assay**

90 4T1 cells were inoculated into a 6-well plate at a density of  $1.5 \times 10^5$  per well and  
91 cultured for 12 h, and then incubated with 200  $\mu$ g/mL of MFSE and MFS labeled with  
92 Nile red for 6 h. Then, the treated cells were washed with PBS twice and fixed in 4%  
93 paraformaldehyde for 30 min. Then the fixed cells were stained with DAPI solution for  
94 15 min and observed under LSM 710 confocal laser scanning microscope (CLSM, Carl  
95 Zeiss Microscopy LLC, Germany).

96

97 **H&E staining**

98 Briefly, collected tissues were fixed in 10% neutral buffered formalin and subjected to  
99 paraffin embedding procedures. Paraffin-embedded tissue specimens were cut into 5  $\mu\text{m}$   
100 slices using a microtome and stained with hematoxylin and eosin (H&E). The stained  
101 slices were observed and photographed using a confocal fluorescence microscope.

102

103 **Immunofluorescence staining**

104 The sections were baked at 60 °C for 10 minutes and then stained with xylene, graded  
105 ethanol (100%, 95%, 70%) and PBS for 5 min each. Sections were immersed in antigen  
106 retrieval solution for 10 min at a temperature of 80°C. Sections were then closed with  
107 10% BSA in PBS for 30 min at room temperature and incubated with anti-PCNA  
108 overnight at 4°C. Sections were then incubated with FITC-labeled secondary antibody  
109 for 1 h blocked with DAPI. Finally, confocal fluorescence microscopy was used for  
110 observation and photography.

111

112 **ELISA analysis**

113 ATP, CRT, HMGB1, and IFN- $\gamma$  of tumor tissues were detected using commercial  
114 ELISA kits. Briefly, the mice tumor tissue was washed with PBS, homogenized, and the  
115 supernatant was collected by centrifugation. The levels of ATP, CRT, HMGB1 and IFN- $\gamma$

116 in the supernatant were detected according to the manufacturer's recommended  
117 procedure.

118

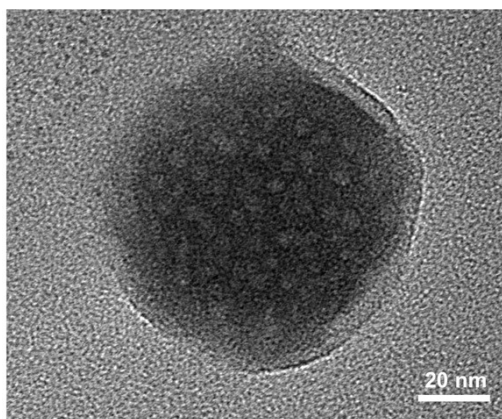

119

120 **Figure S1.** Representative TEM images of exosome.

121

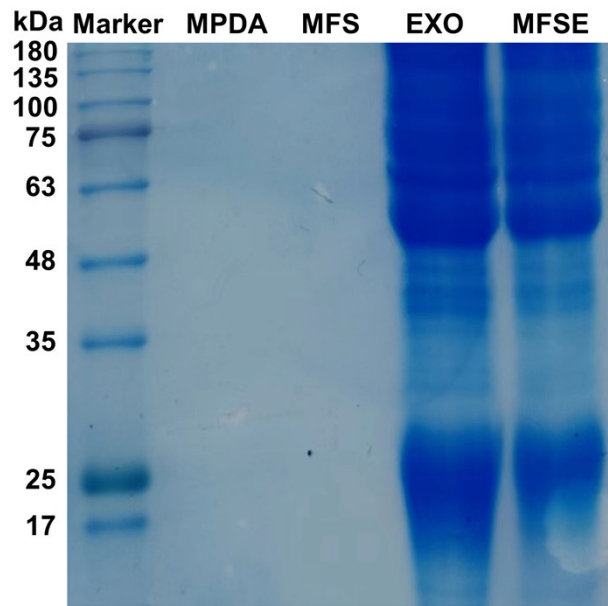

122

123 **Figure S2.** SDS-PAGE analysis of MPDA, MFS, EXO and MFSE.

124

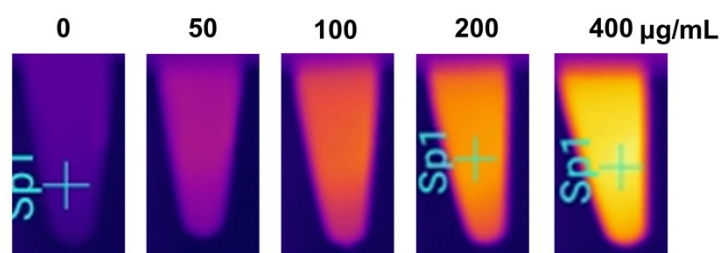

125

126 **Figure S3.** Infrared thermal images of MFSE under irradiation at different concentrations

127 (1 W/cm<sup>2</sup>, 5 min).

128

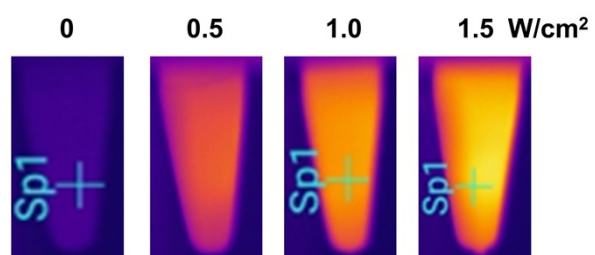

129

130 **Figure S4.** Infrared thermal images of MFSE at different laser power densities under  
131 irradiation (200  $\mu\text{g/mL}$ , 5 min).

132

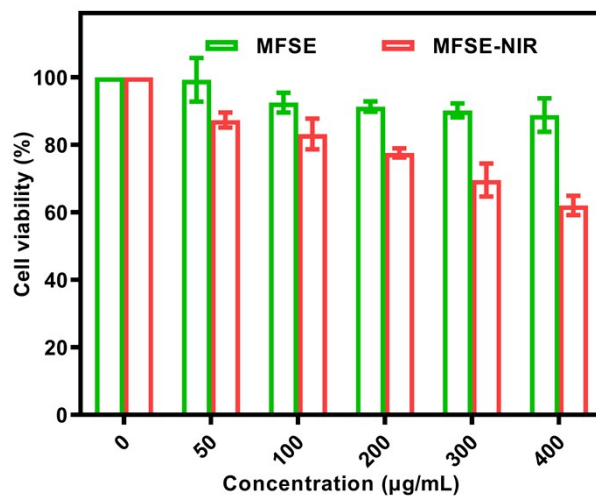

133

134 **Figure S5.** Cell viabilities of MCF-10A cells treated with varying concentrations of

135 MFSE with or without 808 nm laser (n = 3).

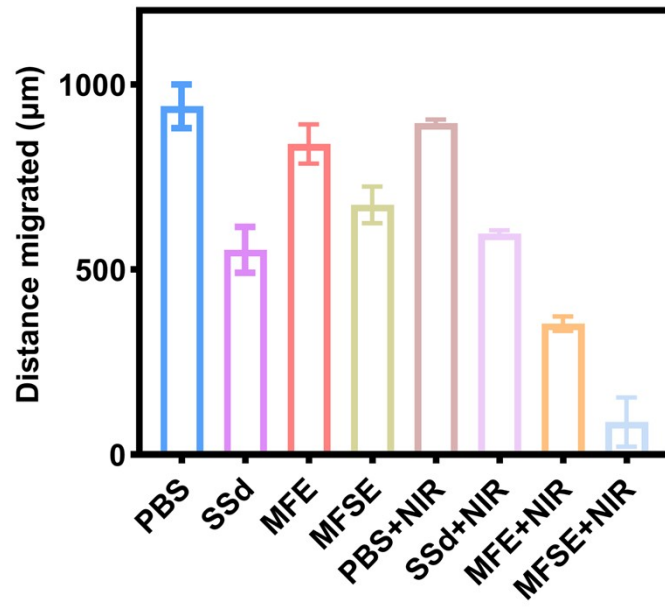

136

137 **Figure S6.** Migration distances of 4T1 cells following various treatments (mean  $\pm$  SD, n  
 138 = 3).

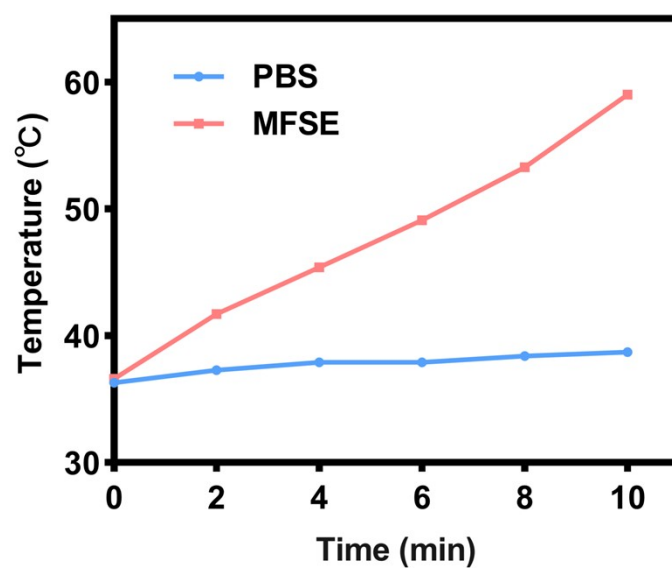

139

140 **Figure S7.** Temperature changes of PBS and MFSE during 10 min of irradiation at 1

141 W/cm<sup>2</sup> with a concentration of 200 µg/mL.

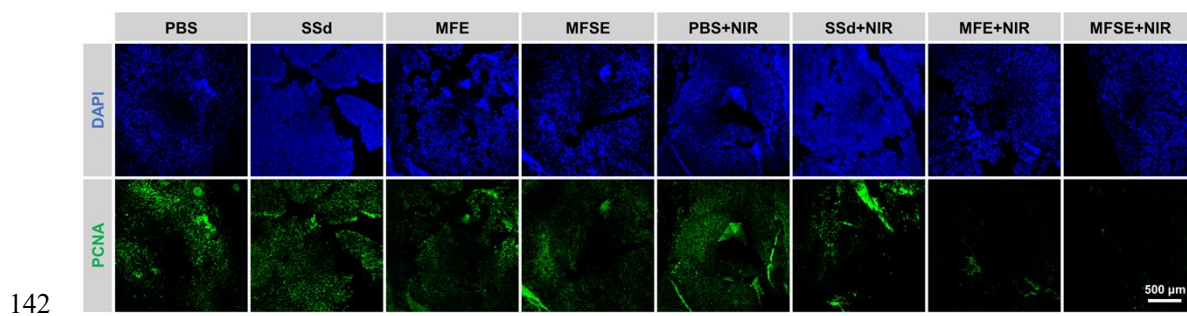

143 **Figure S8.** PCNA staining of the tumor tissues after different treatments.
